# Supplementary figures and images for: Correlation between the Cycle Threshold Values in Detection of Severe Fever with Thrombocytopenia Syndrome Virus Using PowerChekTM SFTSV Real-Time PCR Kit and Viral Load: Prognostic Implications
Source: MDPI journal article supplement (doi:10.3390/v16050700), 2024-04-29

**Figure S1. Flowchart**

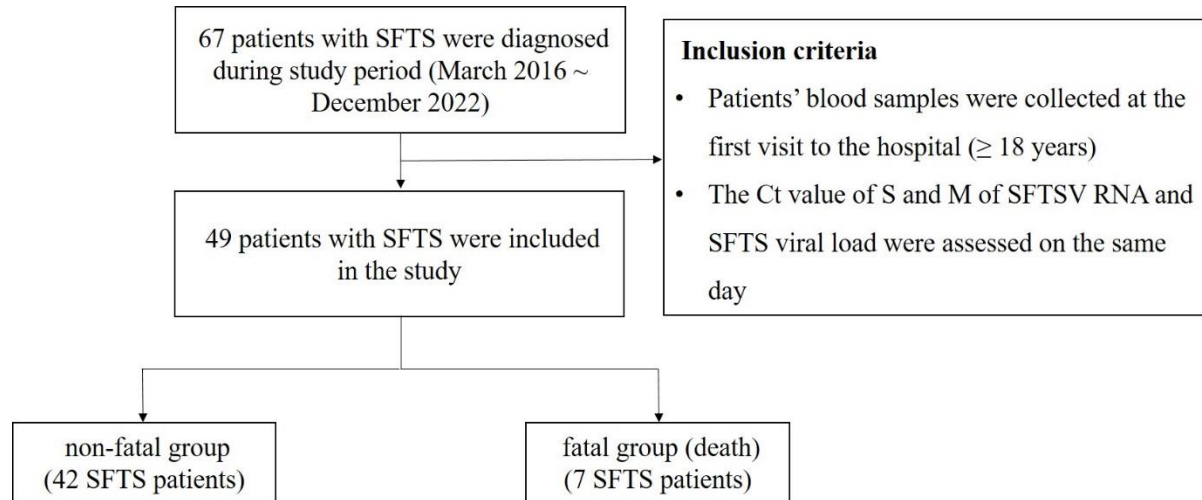

Supplement: s1 [file s1]
